# Supplementary material for: An aggregation-induced emission dye-powered afterglow luminogen for tumor imaging
Source: Royal Society of Chemistry journal article supplement (doi:10.1039/c9sc04901k), 2019-11-11
Supplement: c9sc04901k1.pdf [file c9sc04901k1.pdf]

## Supporting Information

### **Aggregation-Induced Emission Dye-Powered Afterglow Luminogens for Tumor Imaging**

*Yan Xu, Weitao Yang, Defan Yao, Kexin Bian, Weiwei Zeng, Kai Liu, Dengbin Wang  
and Bingbo Zhang\**

Dr. Y. Xu, Dr. W. Yang, Dr. K. Bian, W. Zeng, K. Liu, Prof. B. Zhang  
Department of Medical Ultrasound, Shanghai Tenth People's Hospital  
Tongji University Cancer Center  
Tongji University School of Medicine  
Shanghai 200072, China  
Email: bingbozhang@tongji.edu.cn

Dr. D. Yao, Prof. D. Wang  
Department of Radiology  
Xinhua Hospital  
Shanghai Jiao Tong University School of Medicine  
Shanghai 200092, China

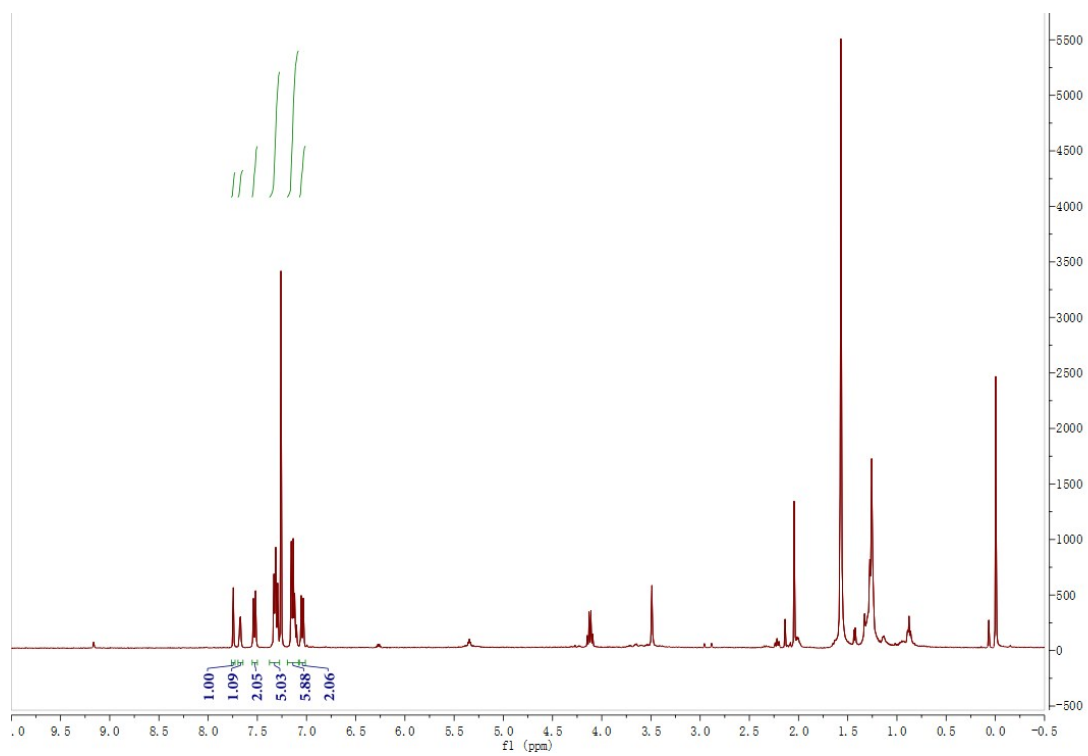

**Figure S1.**  $^1\text{H}$  NMR of TTMN.

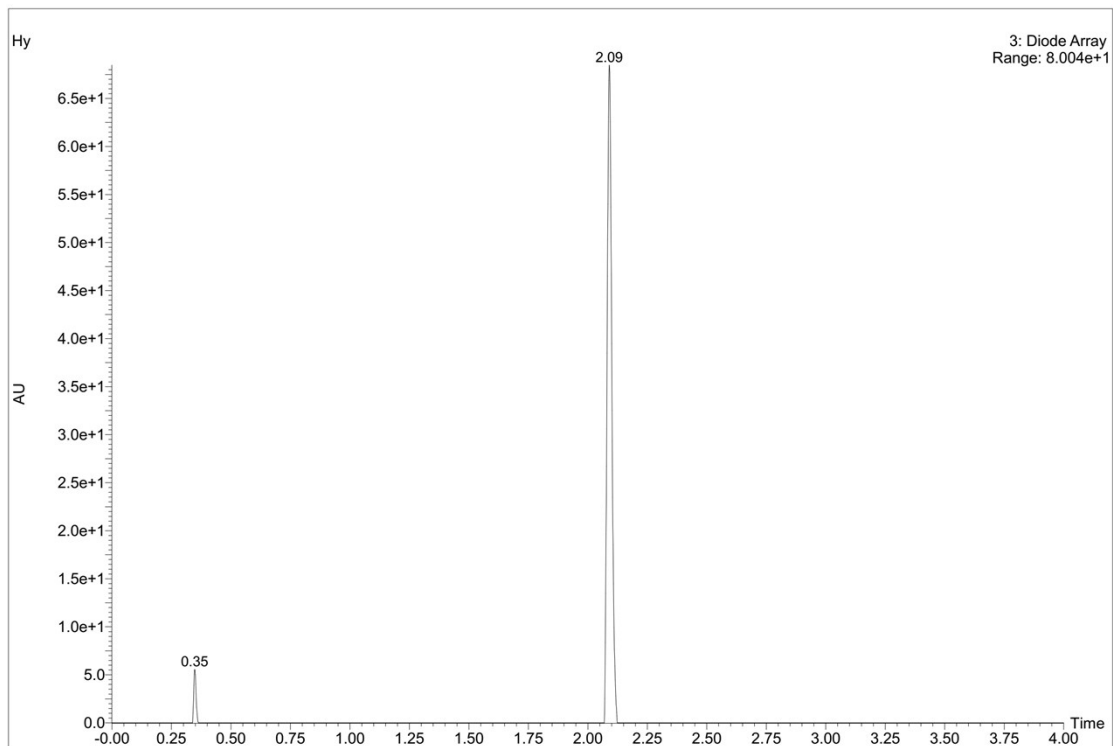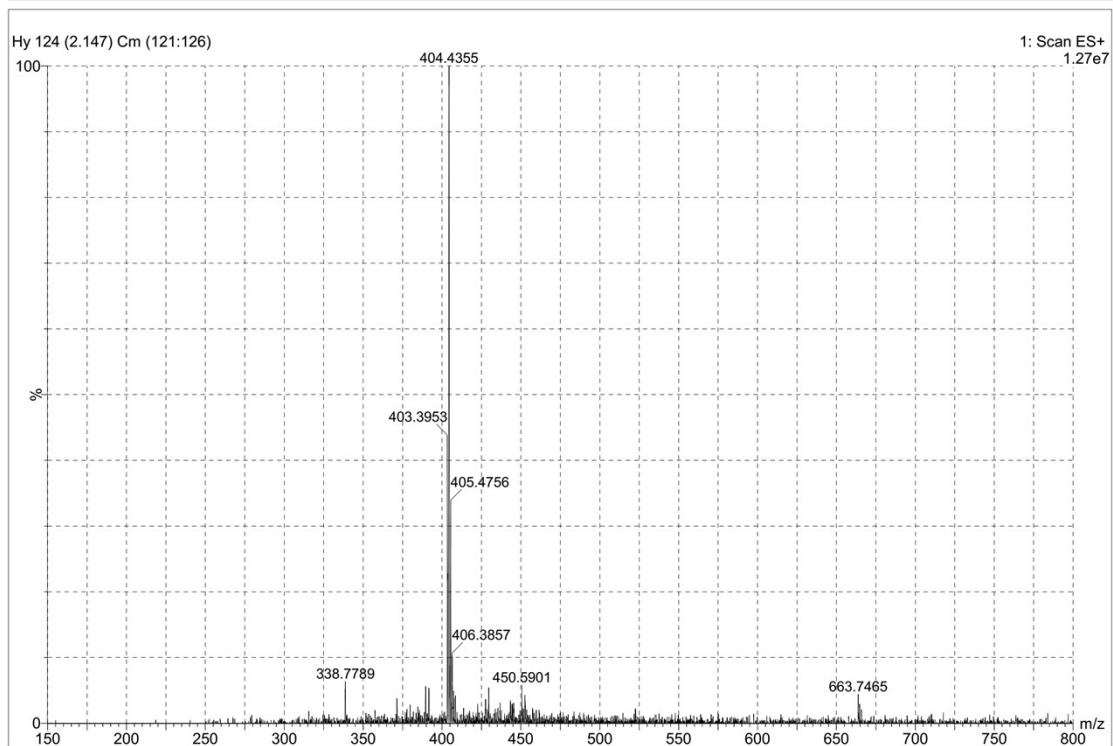

Figure S2. LC-MS of TTMN

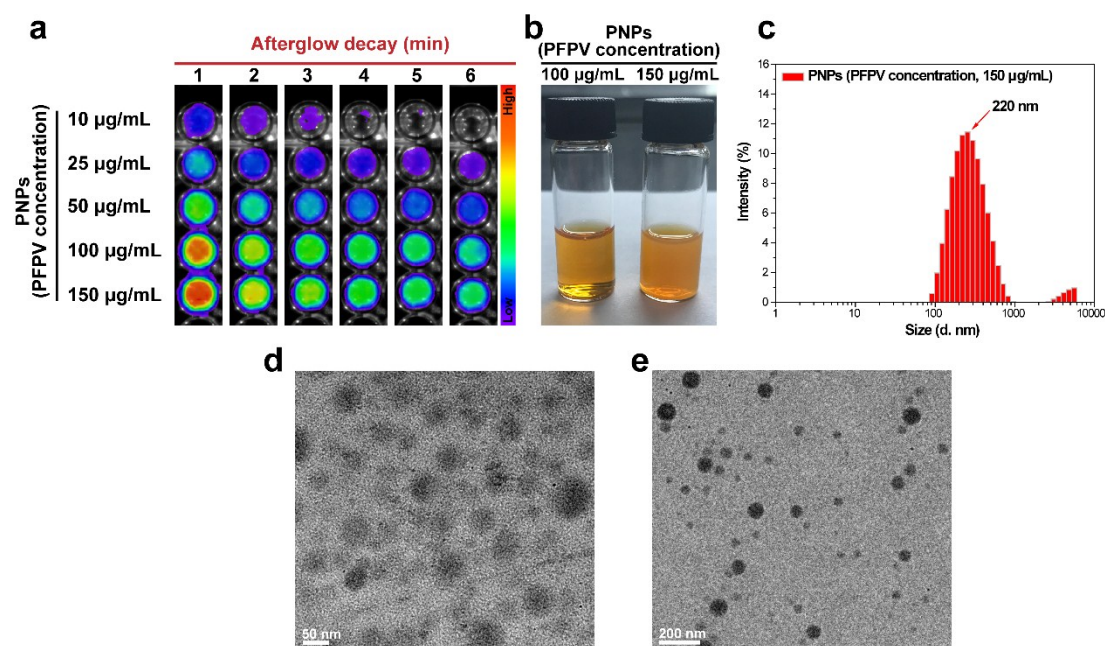

**Figure S3.** a) Afterglow luminescence images of PNP in H<sub>2</sub>O (200 µL) with different PFPV concentration pre-irradiated by a white LED lamp (2000 lm). b) Digital pictures of PNP solution (PFPV concentration, 100 µg/mL and 150 µg/mL). c) DLS result of PNP at 150 µg/mL (PFPV concentration). d) TEM image of PNP. e) TEM image of TNPs.

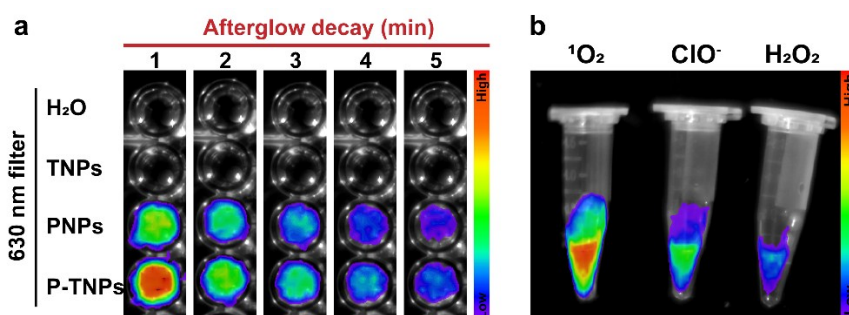

**Figure S4.** a) Afterglow luminescence images of H<sub>2</sub>O, TNPs, PNP and P-TNP (200 µL, PFPV concentration 100 µg/mL, TTMN 10% w/w) pre-irradiated by a white LED lamp (2000 lm) and collected with a 630 nm filter. b) Luminescence images of PNP in the presence of <sup>1</sup>O<sub>2</sub>, ClO<sup>-</sup> and H<sub>2</sub>O<sub>2</sub> agents. The final concentration of the three agents were all 10 mM which are prepared according to previous reports (*J. Am. Chem. Soc.*, 2016, 138, 10778-10781; *Anal. Chem.*, 2018, 90, 13714-13722).

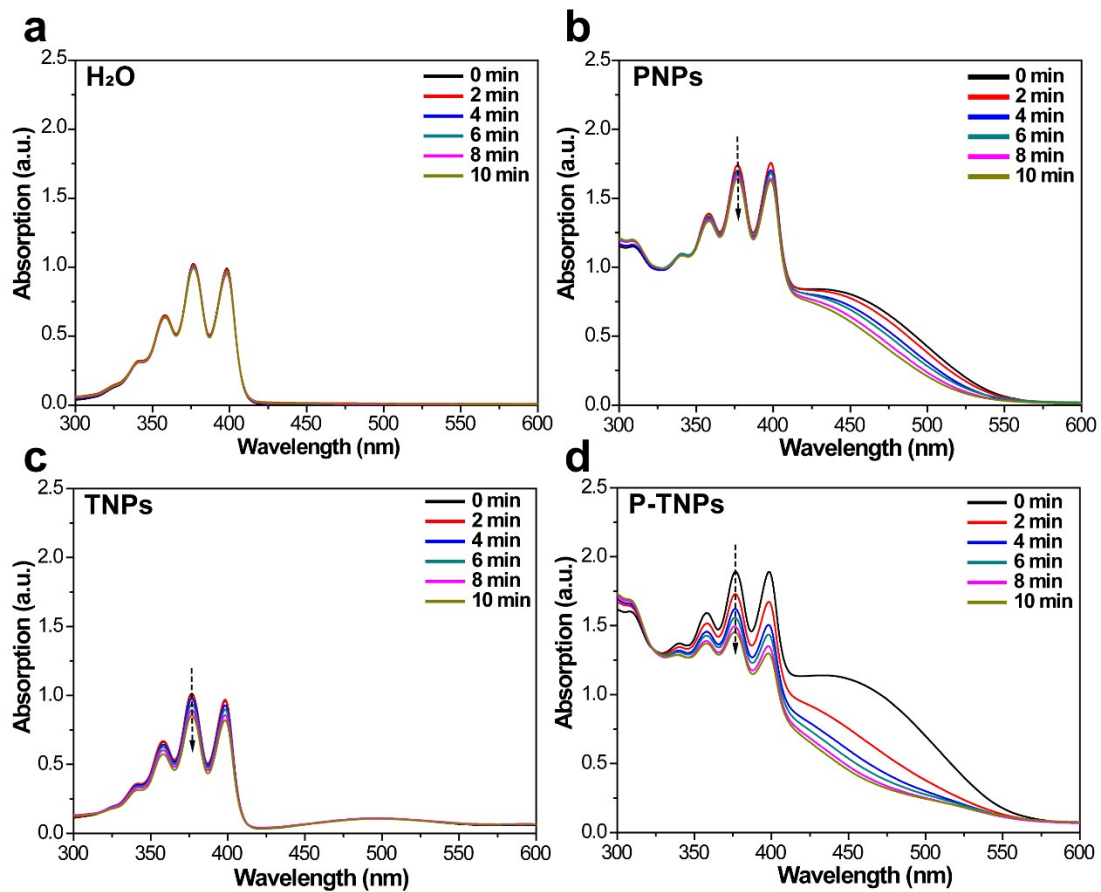

**Figure S5.** The absorption spectra of ABDA (20  $\mu\text{M}$ ) in a) H<sub>2</sub>O, b) PNPs, c) TNPs and d) P-TNPs upon white LED lamp (2000 lm) irradiation for every 2 min.

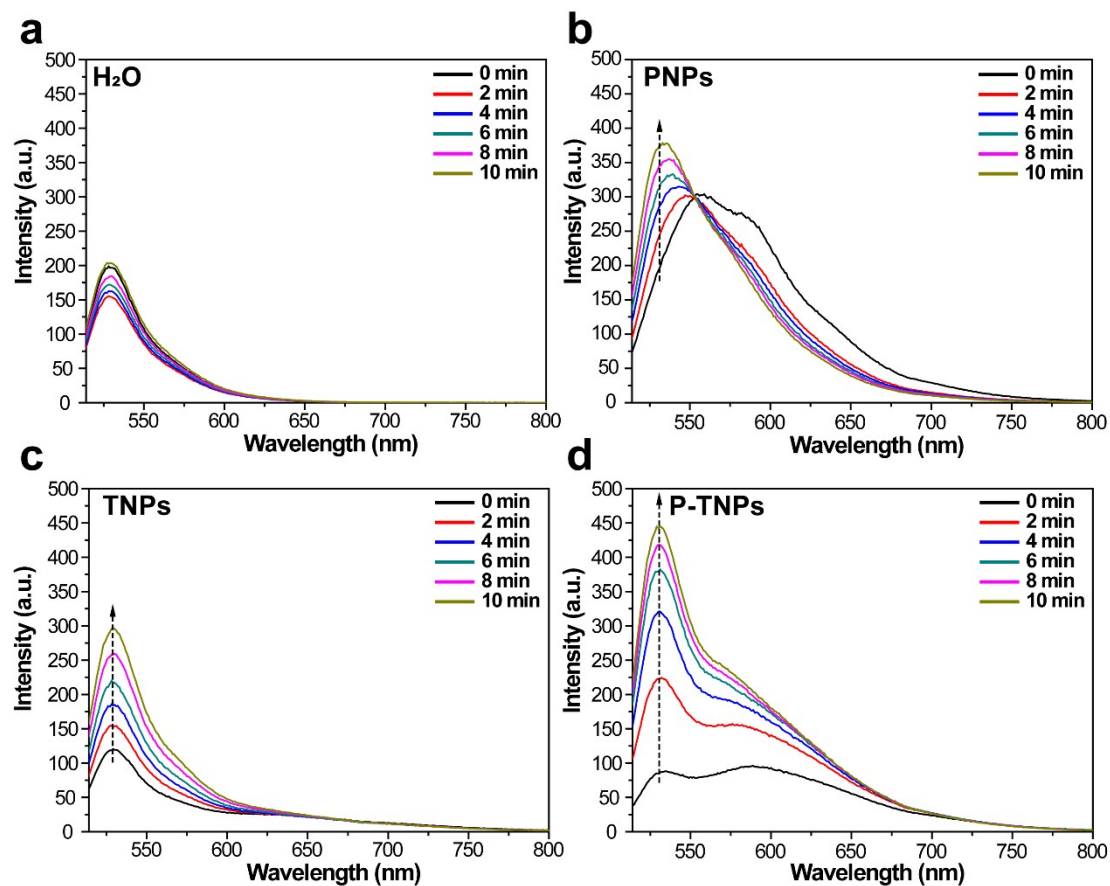

**Figure S6.** The fluorescence spectra of SOSG (2.4  $\mu\text{M}$ ) in a)  $\text{H}_2\text{O}$ , b) PNPs, c) TNPs and d) P-TNPs upon white LED lamp (2000 lm) irradiation for every 2 min.

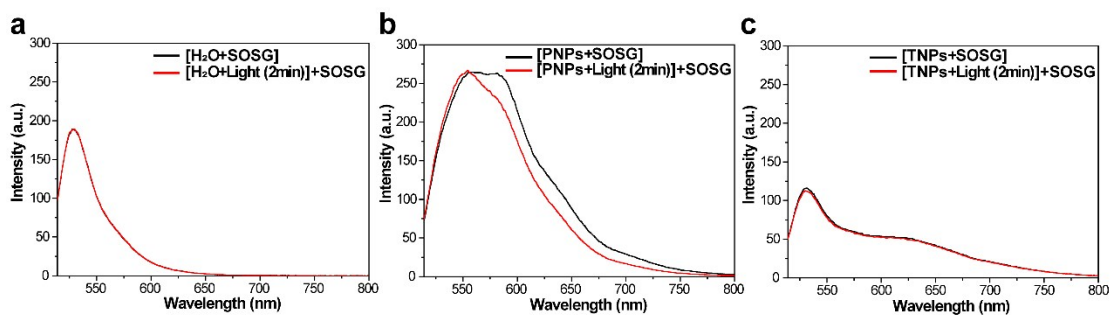

**Figure S7.** The fluorescence spectra of SOSG in a)  $\text{H}_2\text{O}$ , b) PNPs and c) TNPs solutions and SOSG added after those irradiated for 2 min (2000 lm).

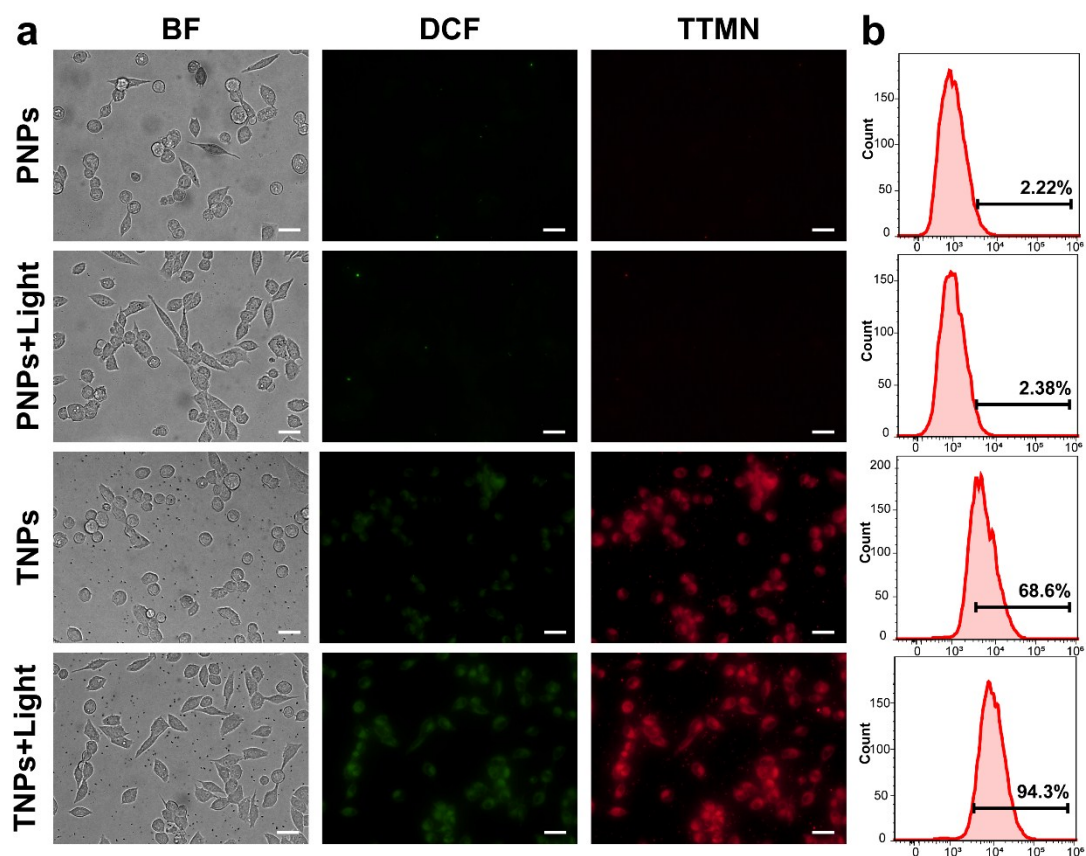

**Figure S8.** a) Intracellular ROS generation of PNPs and TNPs against 4T1 cells upon white light irradiation (2000 lm) for 3 min. Emission: BF (bright field), green from DCF, red from AIE dye (TTMN). Scale bar: 20  $\mu\text{m}$ . b) Flow cytometry analysis of DCF fluorescence intensity in the corresponding groups.
